# Supplementary material
Source: PubMed Central journal article supplement (PMC2665120)
Supplement: M807442200_1.pdf [file M807442200_1.pdf]

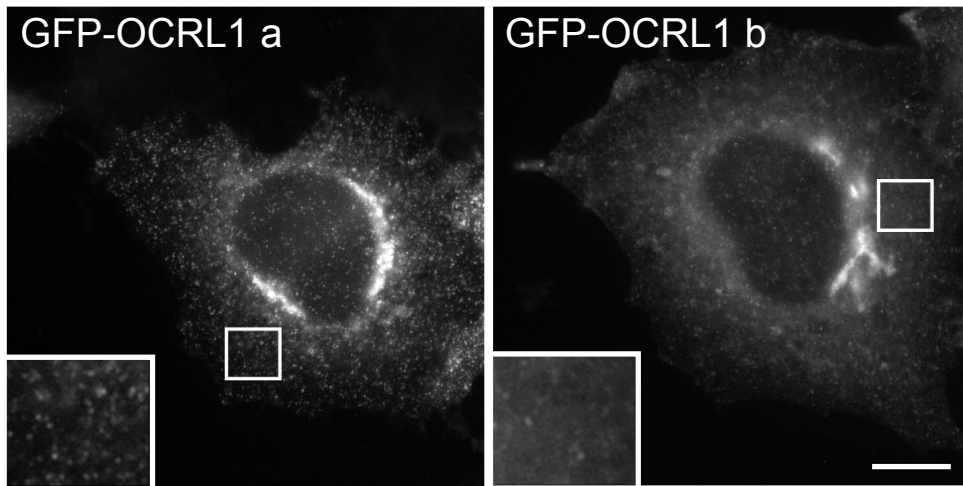

**Figure S1. Cellular localisation of OCRL1 isoforms in HeLa cells.** HeLa cells transiently expressing GFP-tagged OCRL1 isoform a or b were fixed and imaged by epifluorescence microscopy. Bar, 10  $\mu\text{m}$ .

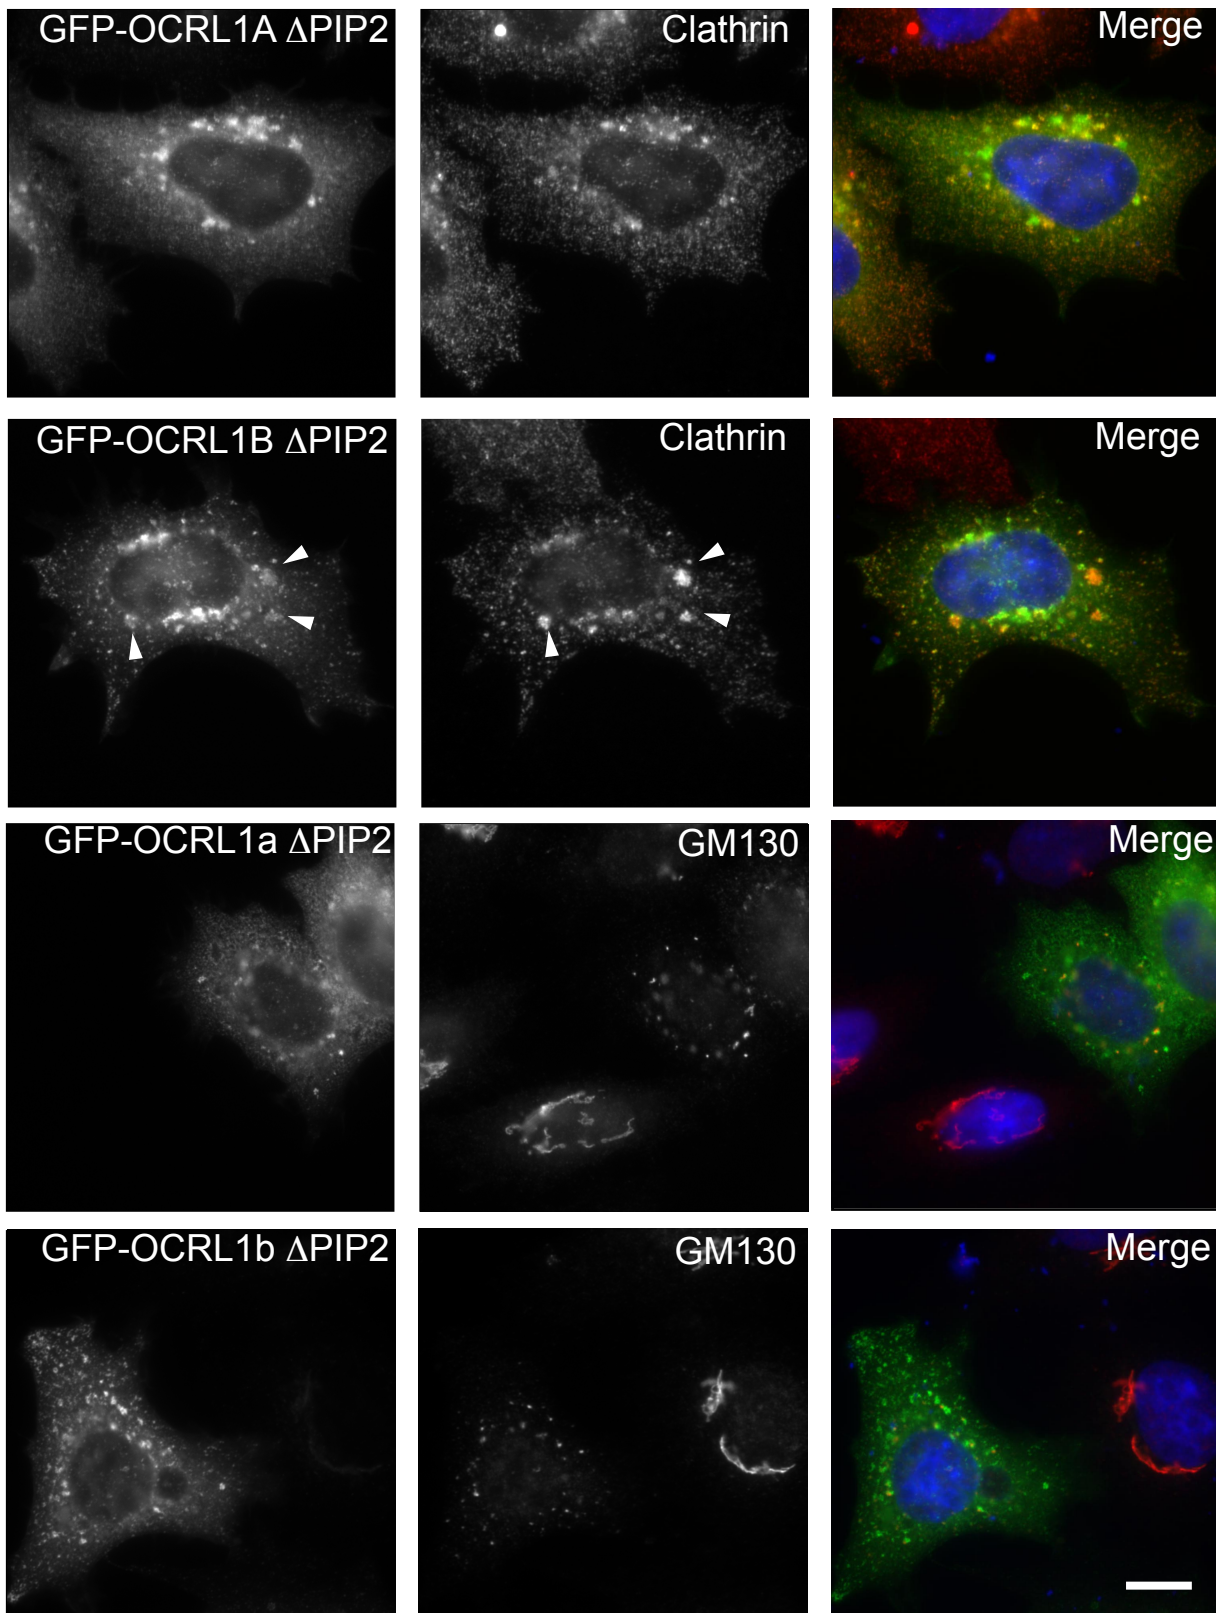

**Figure S2. Expression of GFP-OCRL1 isoform a and b  $\Delta$ PIP2 mutants.** HeLa cells expressing GFP-tagged OCRL1 isoform a or b  $\Delta$ PIP2 mutants (green) were labelled with antibodies to clathrin heavy chain or the cis-Golgi protein GM130 (red). Arrowheads indicate enlarged vacuolar clathrin-positive endosomes seen with isoform b. Bar, 10  $\mu$ m.

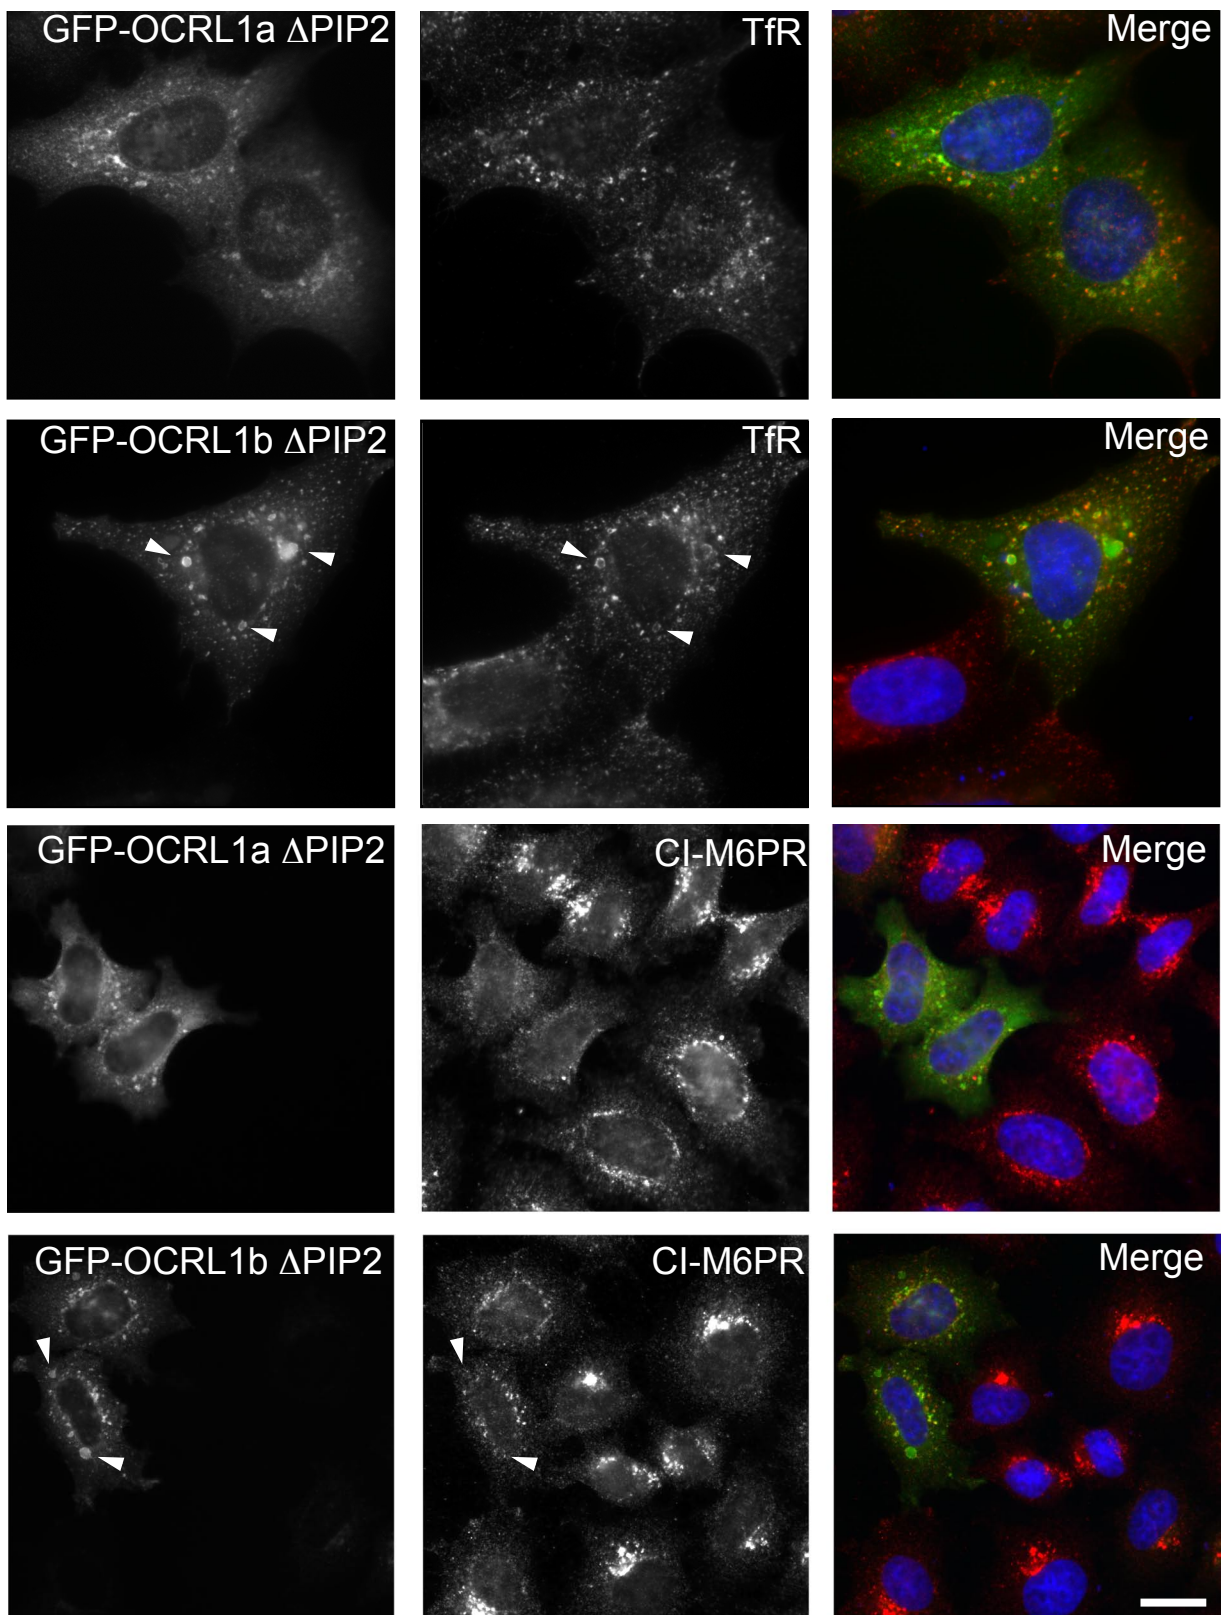

**Figure S3. Expression of GFP-OCRL1 isoform a and b  $\Delta$ PIP2 mutants.** HeLa cells expressing GFP-tagged OCRL1 isoform a or b  $\Delta$ PIP2 mutants (green) were labelled with antibodies to transferrin receptor (TfR) or the cation independent mannose 6-phosphate receptor (CI-M6PR). Arrowheads indicate enlarged vacuolar endosomes seen with isoform b. Bar, 10  $\mu$ m.
